# Supplementary material for: [Hg3(Ge9)4]10−: a nanometric molecular rod precursor to polymeric mercury-linked cluster chains
Source: Royal Society of Chemistry journal article supplement (doi:10.1039/b810990g), 2008-01-01
Supplement: b810990g.pdf [file b810990g.pdf]

### Supporting Information

“ $[\text{Hg}_3(\text{Ge}_9)_4]^{10-}$ : A nanometric molecular rod precursor to polymeric mercury-linked cluster chains.”

*Jose M. Goicoechea*

Calculated powder pattern based on single crystal X-ray diffraction data:

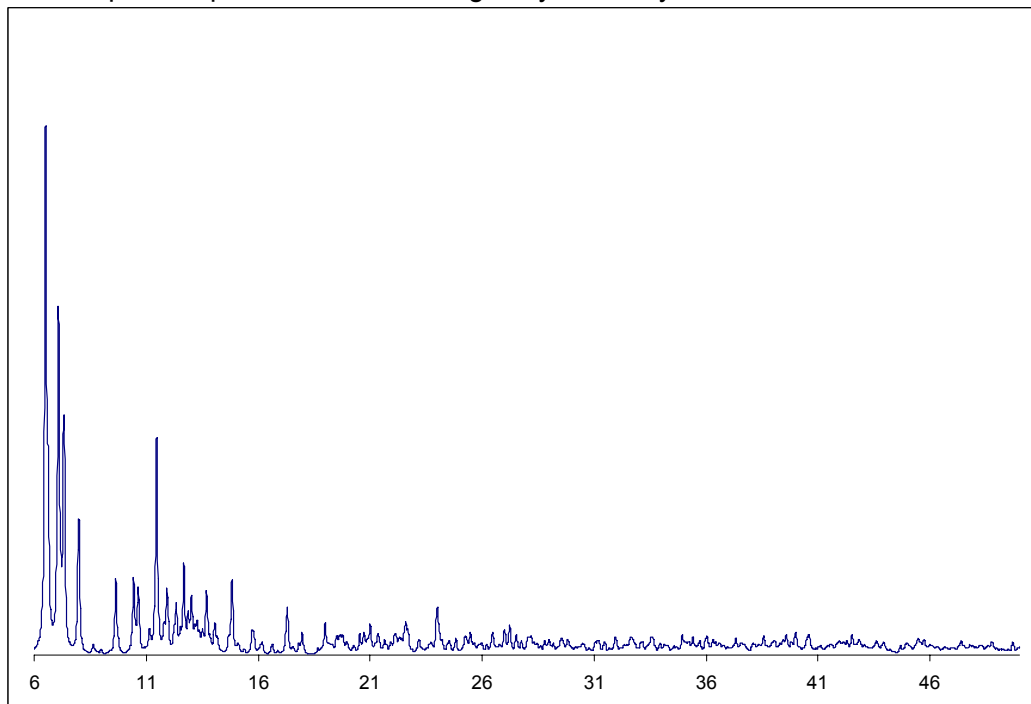

Experimental powder pattern from a solid sample of **1**:

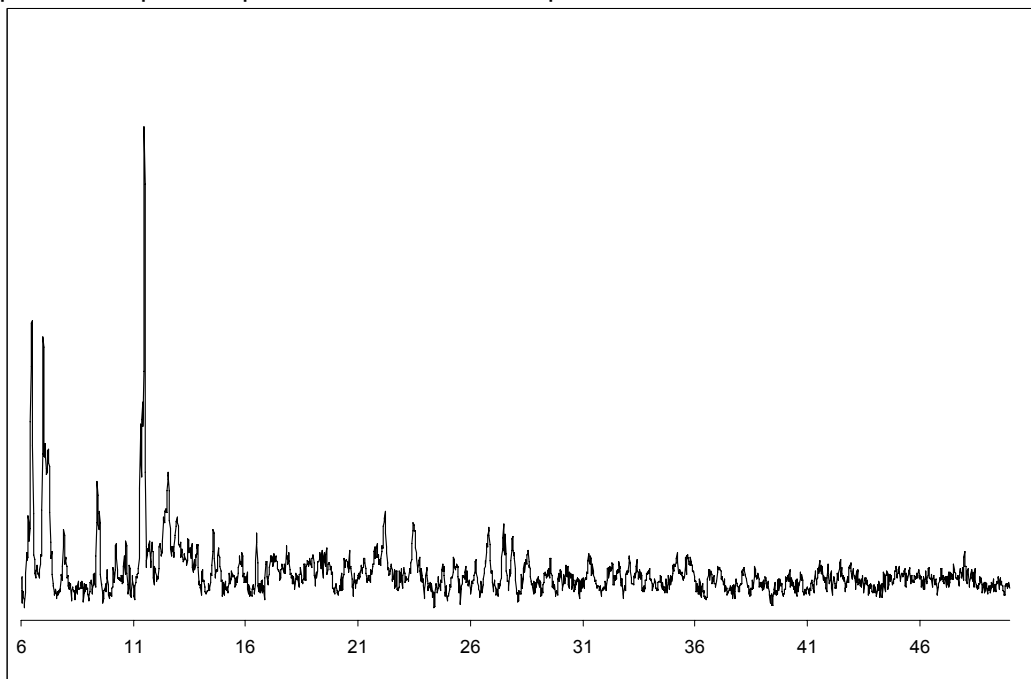

**Powder X-ray Diffraction.** Powder XRD patterns were recorded at room temperature on a PANalytical X'Pert Pro diffractometer using  $\text{Cu K}\alpha$  radiation at 40 kV and 40 mA. Samples were mounted on aluminium plates under Ar in air-tight vessels and scanned in the  $2\theta$  range 6–50°, with a step size of 0.02° and a step time of 1 s.
